# Supplementary material for: Multi-organ imaging demonstrates the heart-brain-liver axis in UK Biobank participants
Source: PubMed Central journal article supplement (PMC9772225; doi:10.1038/s41467-022-35321-2), 2022-12-21
Supplement: 41467_2022_35321_MOESM1_ESM.pdf [file 41467_2022_35321_MOESM1_ESM.pdf]

## Supplementary Information

### Multi-organ imaging demonstrates the heart-brain-liver axis in UK Biobank participants

|                                                                                                 |    |
|-------------------------------------------------------------------------------------------------|----|
| <i>Supplementary Table 1: Missingness in study variables</i> .....                              | 2  |
| <i>Supplementary Table 2: Liver – brain associations</i> .....                                  | 3  |
| <i>Supplementary Table 3: Heart - brain associations</i> .....                                  | 4  |
| <i>Supplementary Table 4: Liver - heart associations</i> .....                                  | 5  |
| <i>Supplementary Table 5: Simultaneous liver-heart analysis</i> .....                           | 6  |
| <i>Supplementary Table 6: Lavaan outputs from three-organ network models</i> .....              | 7  |
| <i>Supplementary Table 7: Technical and clinical validity of liver metrics</i> .....            | 8  |
| <i>Supplementary Table 8: Magnetic resonance imaging details</i> .....                          | 9  |
| <i>Supplementary Table 9: White matter tracts included in average ISOVF and ICVF</i> .....      | 10 |
| <i>Supplementary Table 10: UK Biobank fields for disease classification</i> .....               | 11 |
| <i>Supplementary Table 11: Summary of missing data handling in the main data set</i> .....      | 13 |
| <i>Supplementary Figure 1: Alternative forms considered for three-organ path analysis</i> ..... | 14 |
| <i>Supplementary Table 12: Component loadings</i> .....                                         | 15 |
| <i>Supplementary References</i> .....                                                           | 16 |

**Supplementary Table 1: Missingness in study variables**

| Heart-brain-liver variables   | Whole set<br>(n= 30,444) |               | Liver subset<br>(n= 15,097) |              | Three-organ set<br>(n= 6,865) |         |
|-------------------------------|--------------------------|---------------|-----------------------------|--------------|-------------------------------|---------|
|                               | Present                  | Missing       | Present                     | Missing      | Present                       | Missing |
| LV GFI                        | 29,863 (98.1)            | 581 (1.9)     | 14,654 (97.1)               | 443 (2.9)    | 6,865 (100.0)                 | -       |
| LVM/LVEDV                     | 29,863 (98.1)            | 581 (1.9)     | 14,654 (97.1)               | 443 (2.9)    | 6,865 (100.0)                 | -       |
| LVSVi                         | 29,863 (98.1)            | 581 (1.9)     | 14,654 (97.1)               | 443 (2.9)    | 6,865 (100.0)                 | -       |
| AoD                           | 23,079 (75.8)            | 7,365 (24.2)  | 11,453 (75.9)               | 3,644 (24.1) | 6,865 (100.0)                 | -       |
| Liver fat (PDFF)              | 15,061 (49.5)            | 15,383 (50.5) | 15,061 (99.8)               | 36 (0.2)     | 6,865 (100.0)                 | -       |
| Liver iron                    | 15,077 (49.5)            | 15,367 (50.5) | 15,077 (99.9)               | 20 (0.1)     | 6,865 (100.0)                 | -       |
| Liver cT1 (ms)                | 11,485 (37.7)            | 18,959 (62.3) | 11,485 (76.1)               | 3,612 (23.9) | 6,865 (100.0)                 | -       |
| Total brain volume            | 29,127 (95.7)            | 1,317 (4.3)   | 13,780 (91.3)               | 1,317 (8.7)  | 6,865 (100.0)                 | -       |
| Grey matter volume            | 29,127 (95.7)            | 1,317 (4.3)   | 13,780 (91.3)               | 1,317 (8.7)  | 6,865 (100.0)                 | -       |
| White matter hyperintensities | 27,954 (91.8)            | 2,490 (8.2)   | 13,291 (88.0)               | 1,806 (12.0) | 6,865 (100.0)                 | -       |
| ICVF                          | 27,148 (89.2)            | 3,296 (10.8)  | 12,760 (84.5)               | 2,337 (15.5) | 6,865 (100.0)                 | -       |
| ISOVF                         | 27,148 (89.2)            | 3,296 (10.8)  | 12,760 (84.5)               | 2,337 (15.5) | 6,865 (100.0)                 | -       |

**Supplementary Table 1:** LVSVi = left ventricular stroke volume indexed to body surface area, LV GFI = left ventricular global function index, LVM/LVEDV = left ventricular mass to volume ratio (left ventricular mass / left ventricular end-diastolic volume), AoD = aortic distensibility. PDFF = proton density fat fraction, cT1 = corrected T1 relaxation time, ICVF = intracellular volume fraction, ISOVF = isotropic volume fraction. Source data are provided as a Source Data file.

**Supplementary Table 2: Liver – brain associations**

|                                                          |           | Total brain volume     | Grey matter volume     | Neurite density (ICVF) | White matter hyperintensities (WMH) | Free-water fraction (ISOVF) |
|----------------------------------------------------------|-----------|------------------------|------------------------|------------------------|-------------------------------------|-----------------------------|
| Cognitive performance<br><i>N</i> = 25,280 - 27,113      | Std. beta | 0.042*                 | 0.041*                 | 0.052*                 | -0.047*                             | -0.025*                     |
|                                                          | 95% CI    | [0.032, 0.052]         | [0.032, 0.050]         | [0.039, 0.064]         | [-0.057, -0.036]                    | [-0.036, -0.013]            |
|                                                          | p-value   | 1.00x10 <sup>-15</sup> | 3.97x10 <sup>-19</sup> | 4.94x10 <sup>-16</sup> | 1.89x10 <sup>-17</sup>              | 2.18x10 <sup>-5</sup>       |
|                                                          | n         | 27,113                 | 27,113                 | 25,280                 | 25,983                              | 25,280                      |
| Liver fat (PDFF, per SD)<br><i>N</i> = 12,727 - 13,747   | Std. beta | -0.019*                | -0.025*                | 0.036*                 | 0.023*                              | 0.019*                      |
|                                                          | 95% CI    | [-0.035, -0.003]       | [-0.039, -0.011]       | [0.016, 0.055]         | [0.006, 0.039]                      | [0.002, 0.037]              |
|                                                          | p-value   | 0.0234                 | 6.32x10 <sup>-4</sup>  | 3.42x10 <sup>-4</sup>  | 0.0067                              | 0.0308                      |
|                                                          | n         | 13,747                 | 13,747                 | 12,727                 | 13,258                              | 12,727                      |
| Fatty liver (PDFF > 5%)<br><i>N</i> = 12,727 - 13,747    | Std. beta | -0.032                 | -0.040*                | 0.037                  | 0.033                               | 0.042*                      |
|                                                          | 95% CI    | [-0.068, 0.004]        | [-0.072, -0.009]       | [-0.005, 0.080]        | [-0.003, 0.069]                     | [0.004, 0.080]              |
|                                                          | p-value   | 0.0793                 | 0.0113                 | 0.0876                 | 0.0704                              | 0.032                       |
|                                                          | n         | 13,747                 | 13,747                 | 12,727                 | 13,258                              | 12,727                      |
| Liver cT1 (per SD increase)<br><i>N</i> = 9,649 - 10,403 | Std. beta | -0.017                 | -0.029*                | -0.029*                | 0.040*                              | 0.040*                      |
|                                                          | 95% CI    | [-0.034, 0.000]        | [-0.044, -0.013]       | [-0.050, -0.008]       | [0.022, 0.057]                      | [0.022, 0.058]              |
|                                                          | p-value   | 0.0565                 | 2.72x10 <sup>-4</sup>  | 0.0062                 | 8.53x10 <sup>-6</sup>               | 1.86x10 <sup>-5</sup>       |
|                                                          | n         | 10,403                 | 10,403                 | 9,649                  | 10,138                              | 9,649                       |
| cT1 >= 750 ms<br><i>N</i> = 9,649 - 10,403               | Std. beta | -0.031                 | -0.063*                | -0.026                 | 0.073*                              | 0.065*                      |
|                                                          | 95% CI    | [-0.076, 0.015]        | [-0.103, -0.023]       | [-0.080, 0.028]        | [0.027, 0.119]                      | [0.017, 0.113]              |
|                                                          | p-value   | 0.1843                 | 0.002                  | 0.3439                 | 0.0017                              | 0.0076                      |
|                                                          | n         | 10,403                 | 10,403                 | 9,649                  | 10,138                              | 9,649                       |
| Liver iron (per SD)<br><i>N</i> = 12,741 - 13,761        | Std. beta | -0.015                 | -0.021*                | 0.038*                 | 0.005                               | 0.012                       |
|                                                          | 95% CI    | [-0.029, -0.001]       | [-0.033, -0.008]       | [0.022, 0.055]         | [-0.009, 0.019]                     | [-0.003, 0.027]             |
|                                                          | p-value   | 0.0402                 | 8.91x10 <sup>-4</sup>  | 6.53x10 <sup>-6</sup>  | 0.512                               | 0.11                        |
|                                                          | n         | 13,761                 | 13,761                 | 12,741                 | 13,273                              | 12,741                      |

**Supplementary Table 2:** Entries are standardised beta coefficients, 95% confidence intervals and p-values from linear regression models. Each cell represents one model, with the brain variable placed as the outcome/response and the liver variable placed as the exposure/predictor. Models are adjusted by age, sex, diabetes, hypertension, BMI  $\geq 30$  kg/m<sup>2</sup>, high cholesterol, smoking, physical activity, alcohol consumption, deprivation, educational level, red blood count, total cholesterol, glycosylated haemoglobin, and imaging confounders (including head size, imaging site, scanner coordinates, date of scanning and interactions). P-values are from two-sided T-tests for each coefficient. An asterisk indicates significance after adjustment for multiple testing with a false discovery rate of 5%. PDFF = proton density fat fraction, cT1 = corrected T1 relaxation time, ICVF = intracellular volume fraction, ISOVF = isotropic volume fraction. Source data are provided as a Source Data file.

**Supplementary Table 3: Heart - brain associations**

|                                                                          |           | Total brain volume | Grey matter volume | Neurite density (ICVF) | White matter hyperintensities (WMH) | Free-water fraction (ISOVF) |
|--------------------------------------------------------------------------|-----------|--------------------|--------------------|------------------------|-------------------------------------|-----------------------------|
| <b>Cognitive performance</b><br><i>N</i> = 25,280 - 27,113               | Std. beta | 0.042*             | 0.041*             | 0.052*                 | -0.047*                             | -0.025*                     |
|                                                                          | 95% CI    | [0.032, 0.052]     | [0.032, 0.050]     | [0.039, 0.064]         | [-0.057, -0.036]                    | [-0.036, -0.013]            |
|                                                                          | p-value   | 1.00x10-15         | 3.97x10-19         | 4.94x10-16             | 1.89x10-17                          | 2.18x10-5                   |
|                                                                          | n         | 27,113             | 27,113             | 25,280                 | 25,983                              | 25,280                      |
| <b>LV Stroke volume (LVSVi)</b><br><i>N</i> = 26,653 - 28,561            | Std. beta | 0.040*             | 0.031*             | 0.009                  | -0.041*                             | -0.007                      |
|                                                                          | 95% CI    | [0.030, 0.050]     | [0.023, 0.040]     | [-0.003, 0.021]        | [-0.052, -0.031]                    | [-0.019, 0.004]             |
|                                                                          | p-value   | 7.27x10-16         | 5.52x10-13         | 0.1615                 | 4.42x10-15                          | 0.1833                      |
|                                                                          | n         | 28,561             | 28,561             | 26,653                 | 27,438                              | 26,653                      |
| <b>LV Global function index (LV GFI)</b><br><i>N</i> = 26,653 - 28,561   | Std. beta | 0.003              | 0.006              | 0.038*                 | -0.050*                             | -0.033*                     |
|                                                                          | 95% CI    | [-0.007, 0.014]    | [-0.002, 0.015]    | [0.026, 0.051]         | [-0.060, -0.039]                    | [-0.044, -0.021]            |
|                                                                          | p-value   | 0.5039             | 0.1554             | 1.01x10-9              | 6.73x10-20                          | 1.68x10-8                   |
|                                                                          | n         | 28,561             | 28,561             | 26,653                 | 27,438                              | 26,653                      |
| <b>LV Mass-to-volume ratio (LVM/LVEDV)</b><br><i>N</i> = 26,653 - 28,561 | Std. beta | -0.003             | -0.016*            | -0.046*                | 0.063*                              | 0.045*                      |
|                                                                          | 95% CI    | [-0.013, 0.008]    | [-0.025, -0.006]   | [-0.059, -0.033]       | [0.051, 0.074]                      | [0.033, 0.057]              |
|                                                                          | p-value   | 0.6398             | 0.0011             | 5.60x10-12             | 1.92x10-27                          | 3.82x10-13                  |
|                                                                          | n         | 28,561             | 28,561             | 26,653                 | 27,438                              | 26,653                      |
| <b>Aortic distensibility (AoD)</b><br><i>N</i> = 20,610 - 22,080         | Std. beta | 0.023*             | 0.030*             | 0.060*                 | -0.098*                             | -0.067*                     |
|                                                                          | 95% CI    | [0.009, 0.037]     | [0.018, 0.042]     | [0.043, 0.076]         | [-0.112, -0.083]                    | [-0.082, -0.051]            |
|                                                                          | p-value   | 0.0011             | 1.44x10-6          | 5.02x10-12             | 8.66x10-40                          | 3.26x10-17                  |
|                                                                          | n         | 22,080             | 22,080             | 20,610                 | 21,166                              | 20,610                      |

**Supplementary Table 3:** Entries are standardised beta coefficients, 95% confidence intervals and p-values from linear regression models. Each cell represents one model, with the brain variable placed as the outcome/response and the heart variable placed as the exposure/predictor. Models are adjusted by age, sex, diabetes, hypertension, BMI  $\geq 30$  kg/m<sup>2</sup>, high cholesterol, smoking, physical activity, alcohol consumption, deprivation, educational level, red blood count, total cholesterol, glycosylated haemoglobin, and imaging confounders (including head size, imaging site, scanner coordinates, date of scanning and interactions). P-values are from two-sided T-tests for each coefficient. An asterisk indicates significance after adjustment for multiple testing with a false discovery rate of 5%. LVSVi = left ventricular stroke volume indexed to body surface area, LV GFI = left ventricular global function index, LVM/LVEDV = left ventricular mass to volume ratio (left ventricular mass / left ventricular end diastolic volume), AoD = aortic distensibility, ICVF = intracellular volume fraction, ISOVF = isotropic volume fraction. Source data are provided as a Source Data file.

**Supplementary Table 4: Liver - heart associations**

|                                                                 |           | LV Stroke volume (LVSVi) | LV Global function index (LV GFI) | LV Mass-to-volume ratio (LVM/LVEDV) | Aortic distensibility (AoD) |
|-----------------------------------------------------------------|-----------|--------------------------|-----------------------------------|-------------------------------------|-----------------------------|
| <b>Liver fat (PDFF, per SD)</b><br><i>N = 11,428 - 14,618</i>   | Std. beta | -0.211*                  | -0.048*                           | 0.176*                              | -0.029*                     |
|                                                                 | 95% CI    | [-0.228, -0.195]         | [-0.065, -0.031]                  | [0.160, 0.192]                      | [-0.046, -0.012]            |
|                                                                 | p-value   | 8.65x10 <sup>-136</sup>  | 1.76x10 <sup>-8</sup>             | 1.65x10 <sup>-107</sup>             | 6.16x10 <sup>-4</sup>       |
|                                                                 | n         | 14,618                   | 14,618                            | 14,618                              | 11,428                      |
| <b>Fatty liver (PDFF &gt; 5%)</b><br><i>N = 11,428 - 14,618</i> | Std. beta | -0.350*                  | -0.096*                           | 0.330*                              | -0.033                      |
|                                                                 | 95% CI    | [-0.388, -0.313]         | [-0.134, -0.059]                  | [0.295, 0.365]                      | [-0.071, 0.004]             |
|                                                                 | p-value   | 4.43x10 <sup>-74</sup>   | 4.83x10 <sup>-7</sup>             | 2.75x10 <sup>-75</sup>              | 0.0798                      |
|                                                                 | n         | 14,618                   | 14,618                            | 14,618                              | 11,428                      |
| <b>Liver cT1 (per SD increase)</b><br><i>N = 8,234 - 11,175</i> | Std. beta | -0.084*                  | -0.038*                           | 0.097*                              | 0.011                       |
|                                                                 | 95% CI    | [-0.103, -0.066]         | [-0.056, -0.020]                  | [0.080, 0.113]                      | [-0.008, 0.031]             |
|                                                                 | p-value   | 6.21x10 <sup>-19</sup>   | 3.38x10 <sup>-5</sup>             | 4.10x10 <sup>-31</sup>              | 0.2511                      |
|                                                                 | n         | 11,175                   | 11,175                            | 11,175                              | 8,234                       |
| <b>cT1 &gt;= 750 ms</b><br><i>N = 8,234 - 11,175</i>            | Std. beta | -0.174*                  | -0.070*                           | 0.199*                              | -0.005                      |
|                                                                 | 95% CI    | [-0.222, -0.125]         | [-0.117, -0.022]                  | [0.157, 0.242]                      | [-0.055, 0.046]             |
|                                                                 | p-value   | 2.96x10 <sup>-12</sup>   | 0.0038                            | 5.94x10 <sup>-20</sup>              | 0.852                       |
|                                                                 | n         | 11,175                   | 11,175                            | 11,175                              | 8,234                       |
| <b>Liver iron (per SD)</b><br><i>N = 11,438 - 14,635</i>        | Std. beta | -0.045*                  | 0.012                             | 0.028*                              | -0.012                      |
|                                                                 | 95% CI    | [-0.060, -0.030]         | [-0.002, 0.027]                   | [0.013, 0.042]                      | [-0.026, 0.003]             |
|                                                                 | p-value   | 4.06x10 <sup>-9</sup>    | 0.0996                            | 1.27x10 <sup>-4</sup>               | 0.1086                      |
|                                                                 | n         | 14,635                   | 14,635                            | 14,635                              | 11,438                      |

**Supplementary Table 4:** Entries are standardised beta coefficients and p-values from linear regression models. Each beta coefficient represents one model, with the heart variable placed as the outcome/response and the liver variable placed as the exposure/predictor. Models are adjusted by age, sex, diabetes, hypertension, BMI  $\geq 30$  kg/m<sup>2</sup>, high cholesterol, smoking, physical activity, alcohol consumption, deprivation, educational level, red blood count, total cholesterol, glycosylated haemoglobin. P-values are from two-sided T-tests for each coefficient. An asterisk indicates significance after adjustment for multiple testing with a false discovery rate of 5%. PDFF = proton density fat fraction, cT1 = corrected T1 relaxation time, LVSVi = left ventricular stroke volume indexed to body surface area, LV GFI = left ventricular global function index, LVM/LVEDV = left ventricular mass to volume ratio (left ventricular mass / left ventricular end diastolic volume), AoD = aortic distensibility. Source data are provided as a Source Data file.

**Supplementary Table 5: Simultaneous liver-heart analysis**

| Left hand side    | Right hand side    | Standard. beta | Lower CI | Upper CI | p-value                   | Fit measures                                                    |
|-------------------|--------------------|----------------|----------|----------|---------------------------|-----------------------------------------------------------------|
| Reduced LVSV      | ~ Liver fat (PDFF) | 0.227          | 0.205    | 0.249    | $< 1.00 \times 10^{-250}$ | Chi-square =<br>6.76 (df= 3)<br>RMSEA = 0.021<br>(0.000, 0.025) |
|                   | ~ Liver cT1        | 0.042          | 0.022    | 0.063    | $5.74 \times 10^{-5}$     |                                                                 |
|                   | ~ Liver iron       | 0.051          | 0.036    | 0.066    | $2.91 \times 10^{-11}$    |                                                                 |
|                   | (R <sup>2</sup> )  | 0.160          |          |          |                           |                                                                 |
| Reduced LV GFI    | ~ Liver fat (PDFF) | 0.066          | 0.044    | 0.087    | $2.34 \times 10^{-9}$     | TLI = 0.994<br>N = 8,165                                        |
|                   | ~ Liver cT1        | 0.021          | 0.001    | 0.042    | 0.0415                    |                                                                 |
|                   | (R <sup>2</sup> )  | 0.190          |          |          |                           |                                                                 |
| LVM/LVEDV         | ~ Liver fat (PDFF) | 0.185          | 0.166    | 0.204    | $< 1.00 \times 10^{-250}$ |                                                                 |
|                   | ~ Liver cT1        | 0.054          | 0.036    | 0.072    | $4.39 \times 10^{-9}$     |                                                                 |
|                   | ~ Liver iron       | 0.024          | 0.009    | 0.039    | 0.0023                    |                                                                 |
|                   | (R <sup>2</sup> )  | 0.332          |          |          |                           |                                                                 |
| Aortic stiffening | ~ Liver fat (PDFF) | 0.030          | 0.011    | 0.049    | 0.0020                    |                                                                 |
|                   | (R <sup>2</sup> )  | 0.397          |          |          |                           |                                                                 |

**Supplementary Table 5:** Entries are standardised beta coefficients and p-values from a single path analysis containing four heart outcomes modelled by all liver exposures entered together. Model was fitted using the *sem* function in the *lavaan* package in R. Initially all liver variables were included for each outcome, then non-significant variables were removed one at a time to arrive at the final model. Liver variables were orthogonalized prior to modelling (see Supplementary Table 12 for details). P-values are from two-sided Z-tests for each coefficient, and p-values were considered significant after adjustment for multiple testing with a 5% false discovery rate. Paths are adjusted by age, sex, diabetes, hypertension, BMI  $\geq 30\text{kg/m}^2$ , high cholesterol, smoking, physical activity, alcohol consumption, deprivation, educational level, red blood count, total cholesterol, glycosylated haemoglobin. PDFF = proton density fat fraction, cT1 = corrected T1 relaxation time, LVSV = left ventricular stroke volume, LV GFI = left ventricular global function index, LVM/LVEDV = left ventricular mass to volume ratio (left ventricular mass / left ventricular end diastolic volume). Source data are provided as a Source Data file.

**Supplementary Table 6: Lavaan outputs from three-organ network models**

(showing test paths only – not showing confounder coefficients, N= 6,865)

| Model                         | Equation                      | Left hand side     | Right hand side               | Standard. beta      | Lower CI | Upper CI | p-value                     | Fit measures                                                               | Reported in Figure 4?                                                                                |     |
|-------------------------------|-------------------------------|--------------------|-------------------------------|---------------------|----------|----------|-----------------------------|----------------------------------------------------------------------------|------------------------------------------------------------------------------------------------------|-----|
| 1a                            | 1                             | Grey matter volume | ~ Reduced LVSV                | -0.024              | -0.043   | -0.006   | 0.0106                      | Chi-square = 147.70 (df= 9)<br>RMSEA = 0.047 (0.041, 0.054)<br>TLI = 0.881 | Yes                                                                                                  |     |
|                               |                               | Grey matter volume | ~ Aortic stiffening           | -0.038              | -0.060   | -0.017   | 4.56x10 <sup>-4</sup>       |                                                                            |                                                                                                      |     |
|                               |                               | Grey matter volume | ~ Liver ct1                   | -0.029              | -0.046   | -0.011   | 0.0018                      |                                                                            |                                                                                                      |     |
|                               | 2                             | Reduced LVSV       | ~ Liver fat (PDFF)            | 0.229               | 0.206    | 0.252    | < 1.00 x 10 <sup>-250</sup> | R <sup>2</sup> = 0.503                                                     |                                                                                                      |     |
|                               |                               | Reduced LVSV       | ~ Liver cT1                   | 0.037               | 0.015    | 0.059    | 9.01x10 <sup>-4</sup>       |                                                                            |                                                                                                      |     |
|                               | 1b                            | 1                  | Grey matter volume            | ~ Reduced LVSV      | -0.025   | -0.044   | -0.006                      | 0.0112                                                                     | Chi-square = 529.27 (df= 20)<br>RMSEA = 0.061 (0.056, 0.065)<br>TLI = 0.737                          | No  |
| Grey matter volume            |                               |                    | ~ Aortic stiffening           | -0.038              | -0.060   | -0.017   | 4.96x10 <sup>-4</sup>       |                                                                            |                                                                                                      |     |
| Grey matter volume            |                               |                    | ~ Liver cT1                   | -0.030              | -0.048   | -0.012   | 8.86x10 <sup>-4</sup>       |                                                                            |                                                                                                      |     |
| 2                             |                               | Liver fat (PDFF)   | ~ LVSVi                       | 0.213               | 0.189    | 0.237    | < 1.00 x 10 <sup>-250</sup> | R <sup>2</sup> = 0.502                                                     |                                                                                                      |     |
|                               |                               | Liver fat (PDFF)   | ~ LV_GFI                      | -0.038              | -0.062   | -0.014   | 0.0021                      |                                                                            |                                                                                                      |     |
|                               |                               | Liver fat (PDFF)   | ~ LVM/LVEDV                   | 0.152               | 0.127    | 0.177    | < 1.00 x 10 <sup>-250</sup> |                                                                            |                                                                                                      |     |
|                               |                               | Liver fat (PDFF)   | ~ Aortic stiffening           | 0.050               | 0.023    | 0.076    | 2.14x10 <sup>-4</sup>       |                                                                            |                                                                                                      |     |
| 3                             |                               | Liver cT1          | ~ LVM/LVEDV                   | 0.026               | 0.001    | 0.052    | 0.0457                      |                                                                            |                                                                                                      |     |
| 2a                            |                               | 1                  | White matter hyperintensities | ~ LV_GFI            | 0.031    | 0.009    | 0.052                       | 0.0046                                                                     | Chi-square = 480.2 (df= 10)<br>RMSEA = 0.083 (0.077, 0.089)<br>TLI = 0.554<br>R <sup>2</sup> = 0.363 | No  |
|                               |                               |                    | White matter hyperintensities | ~ LVM/LVEDV         | 0.072    | 0.050    | 0.094                       | 1.58x10 <sup>-10</sup>                                                     |                                                                                                      |     |
|                               | White matter hyperintensities |                    | ~ Aortic stiffening           | 0.071               | 0.046    | 0.095    | 1.11x10 <sup>-8</sup>       |                                                                            |                                                                                                      |     |
|                               | White matter hyperintensities |                    | ~ Liver cT1                   | 0.032               | 0.011    | 0.052    | 0.0021                      |                                                                            |                                                                                                      |     |
|                               | 2                             | LVM/LVEDV          | ~ Liver fat (PDFF)            | 0.184               | 0.162    | 0.207    | < 1.00 x 10 <sup>-250</sup> |                                                                            |                                                                                                      |     |
|                               |                               | LVM/LVEDV          | ~ Liver cT1                   | 0.048               | 0.026    | 0.069    | 1.36x10 <sup>-5</sup>       |                                                                            |                                                                                                      |     |
|                               | 2b                            | 1                  | White matter hyperintensities | ~ Reduced LV GFI    | 0.031    | 0.009    | 0.052                       | 0.0056                                                                     | Chi-square = 107.59 (df= 9)<br>RMSEA = 0.040 (0.033, 0.047)<br>TLI = 0.855<br>R <sup>2</sup> = 0.363 | Yes |
|                               |                               |                    | White matter hyperintensities | ~ LVM/LVEDV         | 0.072    | 0.049    | 0.094                       | 5.91x10 <sup>-10</sup>                                                     |                                                                                                      |     |
| White matter hyperintensities |                               |                    | ~ Aortic stiffening           | 0.071               | 0.046    | 0.095    | 1.45x10 <sup>-8</sup>       |                                                                            |                                                                                                      |     |
| White matter hyperintensities |                               |                    | ~ Liver cT1                   | 0.032               | 0.012    | 0.052    | 0.0020                      |                                                                            |                                                                                                      |     |
| 2                             |                               | Liver ct1          | ~ LVM/LVEDV                   | 0.026               | 0.001    | 0.052    | 0.0046                      |                                                                            |                                                                                                      |     |
|                               |                               |                    |                               |                     |          |          |                             |                                                                            |                                                                                                      |     |
| 3                             |                               | 1                  | ISOVF                         | ~ Aortic stiffening | 0.068    | 0.042    | 0.094                       | 3.41x10 <sup>-7</sup>                                                      | Chi-square = 0.00 (df = 0)<br>RMSEA = 0.000 , TLI = 1.000                                            | Yes |
|                               |                               |                    | ISOVF                         | ~ Liver cT1         | 0.042    | 0.020    | 0.064                       | 1.87x10 <sup>-4</sup>                                                      |                                                                                                      |     |
|                               |                               | ISOVF              | (R <sup>2</sup> )             | 0.251               |          |          | R <sup>2</sup> = 0.251      | (Both forms reduced to these paths)                                        |                                                                                                      |     |

**Supplementary Table 6:** Final results from multi-organ path analysis for simultaneous liver/heart associations with grey matter volume, white matter hyperintensities and free-water fraction (ISOVF), in the subset with complete cases across three organs (N= 6,865). Path analysis models were fitted using the *sem* function in the *lavaan* package in R. All paths are adjusted by age, sex, height, diabetes, hypertension, high cholesterol, smoking, physical activity, alcohol intake frequency, Townsend deprivation score, education, systolic blood pressure, BMI  $\geq$  30 kg/m<sup>2</sup>, total cholesterol, glycated haemoglobin and red blood cell count. Paths featuring the brain (labelled Equation 1 above) are additionally adjusted by head size, imaging site, scanner coordinates and date of imaging. P-values are from two-sided Z-tests for each coefficient, and p-values were considered significant after adjustment for multiple testing with a 5% false discovery rate. The chi-square in model 3 is zero as this has reduced to a single fitted linear equation. Prior to simultaneous modelling, heart and liver predictors were orthogonalized to remove within-organ correlation (see Supplementary Table 12 for details). Source data are provided as a Source Data file.

**Supplementary Table 7: Technical and clinical validity of liver metrics  
Evidence from mixed/healthy cohorts**

**A: Measurement and description of liver features in UK Biobank**

| Study                               | Sample                                                      | Metric(s)             | Comment                                        |
|-------------------------------------|-------------------------------------------------------------|-----------------------|------------------------------------------------|
| Wilman et al., (2017) <sup>1</sup>  | N= 4,949 UK Biobank                                         | PDFF                  | Associations with age, BMI, hypertension, T2DM |
| McKay et al., (2018) <sup>2</sup>   | N= 9,108 UK Biobank                                         | PDFF, liver iron      | Normal ranges for liver iron                   |
| Mojtahed et al.,(2019) <sup>3</sup> | N= 2,816 UK Biobank<br>Subset = 1037 with low risk of NAFLD | PDFF, liver iron, cT1 | Normal ranges for cT1                          |

**B: Measurement validation of liver features in mixed/healthy cohorts**

| Study                                | Sample                                         | Metrics                | Comment                                                                                  |
|--------------------------------------|------------------------------------------------|------------------------|------------------------------------------------------------------------------------------|
| Bachtiar et al. (2019) <sup>4</sup>  | N= 61, mixed liver conditions= 32, healthy= 29 | PDFF, T2*, cT1         | All three metrics have good reproducibility across scanner and field strength            |
| Henninger et al. (2021) <sup>5</sup> | N= 369 people with elevated serum ferritin     | MRI-derived liver iron | Excellent agreement with biopsy-validated R2*                                            |
| Hutton et al. (2018) <sup>6</sup>    | Phantoms + 4,949 UK Biobank participants       | PDFF, T2* (LMS IDEAL)  | Excellent agreement of PDFF and T2* across scanners, field strengths and range of values |
| McDonald et al. (2018) <sup>7</sup>  | N= 149 mixed cohort<br>Healthy volunteers = 22 | PDFF, T2*, cT1         | Good predictive accuracy for all three metrics                                           |

**C: Epidemiological studies using liver metrics in mixed/healthy cohorts**

| Study                                 | Sample                                                                                                  | Metric(s)                   | Comment                                                                     |
|---------------------------------------|---------------------------------------------------------------------------------------------------------|-----------------------------|-----------------------------------------------------------------------------|
| Harrison et al. (2021) <sup>8</sup>   | N= 664, liver steatosis= 244, healthy 420                                                               | PDFF, cT1                   | PDFF and cT1 used to detect NAFLD and fibrosis                              |
| Bamberg et al. (2017) <sup>9</sup>    | N= 400, healthy = 243, prediabetes = 103, diabetes = 54                                                 | PDFF                        | Prediabetic livers had higher PDFF than normal livers                       |
| Rehm et al. (2014) <sup>10</sup>      | 132 healthy young females                                                                               | PDFF                        | Hepatic steatosis detected in 15% of subjects, correlates well with MRS     |
| Qi et al. (2021) <sup>11</sup>        | 143 liver transplant donors                                                                             | PDFF                        | Reliably predicted donor outcomes                                           |
| Garteiser et al. (2021) <sup>12</sup> | 152 obese candidates for bariatric surgery, low alcohol, without serious liver disease (may have NAFLD) | PDFF, confirmed with biopsy | PDFF outperforms transient elastography in diagnosing and grading steatosis |
| Parisinos et al. (2020) <sup>13</sup> | N= 14,440 UK Biobank participants                                                                       | cT1                         | Genetic associations with liver inflammation and scarring                   |
| Dennis et al. (2020) <sup>14</sup>    | N= 201 COVID positive, healthy controls = 36                                                            | PDFF, cT1                   | Higher liver fat and fibroinflammation in COVID positive patients           |



**Supplementary Table 8: Magnetic resonance imaging details**

| Organ                                     | Sequence                                                                | Acquisition parameters (as reported by <sup>15</sup> )                                                                                                         | Processing, quality control and analysis                                                                                                                                                                                                                                                                                                                                                                                                                                                                                                                                       | Imaging-derived phenotypes produced                                                                                                                                                                                                                                               | Key references for full protocol                                                                                                                                                                                   |
|-------------------------------------------|-------------------------------------------------------------------------|----------------------------------------------------------------------------------------------------------------------------------------------------------------|--------------------------------------------------------------------------------------------------------------------------------------------------------------------------------------------------------------------------------------------------------------------------------------------------------------------------------------------------------------------------------------------------------------------------------------------------------------------------------------------------------------------------------------------------------------------------------|-----------------------------------------------------------------------------------------------------------------------------------------------------------------------------------------------------------------------------------------------------------------------------------|--------------------------------------------------------------------------------------------------------------------------------------------------------------------------------------------------------------------|
| Liver MRI<br>Siemens 1.5T MAGNETOM Aera.  | shMOLLI (shortened modified Look-Locker imaging)                        | Resolution: 1.146 x 1.146 x 8,<br>Matrix: 384 x 288 x 7<br>TE/TR = 1.93/480.6 ms, $\alpha = 35^\circ$ , R = 2                                                  | Main extraction and analysis via Perspectum's LiverMultiScan™ Discover software <sup>16</sup><br><br>PDFF maps were constructed, using a three-point Dixon technique <sup>17</sup><br><br>Further large-scale phenotyping via a deep learning method <sup>18</sup>                                                                                                                                                                                                                                                                                                             | Proton density fat fraction (PDFF)<br>Liver iron<br>Corrected T1 (cT1)                                                                                                                                                                                                            | McKay et al. (2018) <sup>19</sup><br>Mojtahed et al. (2019) <sup>20</sup><br>Wilman et al. (2017) <sup>21</sup><br>Perpectum (2016) <sup>16</sup>                                                                  |
|                                           | LMS (LiverMultiScan)                                                    | Resolution: 1.719 x 1.719 x 10<br>Matrix: 256 x 232 x 6<br>TE/TR = 1.2 (min) TE/TR = 7.2 (max)/14 ms, $\alpha = 5^\circ$                                       |                                                                                                                                                                                                                                                                                                                                                                                                                                                                                                                                                                                |                                                                                                                                                                                                                                                                                   |                                                                                                                                                                                                                    |
|                                           | ME GRE (multi-echo spoiled-gradient-echo acquisition)                   | Resolution: 2.5 x 2.5 x 6<br>Matrix: 160 x 160 x 10<br>TE/TR = 2.38(min)<br>TE/TR = 23.8(max)/27 ms, $\alpha = 20^\circ$                                       |                                                                                                                                                                                                                                                                                                                                                                                                                                                                                                                                                                                |                                                                                                                                                                                                                                                                                   |                                                                                                                                                                                                                    |
| Cardiac MRI<br>Siemens 1.5T MAGNETOM Aera | LAX Long axis                                                           | Resolution: 1.9 x 1.9 x 6<br>Matrix: 210 x 208 x 50<br>TE/TR = 1.16/32 ms, $\alpha = 65^\circ$ , R = 2                                                         | Imaging-derived markers extracted via a combination of:<br><ul style="list-style-type: none"> <li>• Automatic scanner-provided values</li> <li>• Expert analysis and segmentation of initial set of 5,000 scans</li> <li>• Automated image segmentation via deep learning algorithms</li> </ul>                                                                                                                                                                                                                                                                                | LV stroke volume<br>LV mass<br>LV ejection fraction<br>Aortic distensibility<br>Left atrial volume<br>Left atrial ejection fraction<br>Global longitudinal strain                                                                                                                 | Petersen et al. (2013) <sup>22</sup><br>Petersen et al. (2016) <sup>23</sup><br>Petersen et al. (2017) <sup>22</sup><br>Bai et al. (2017) <sup>24</sup>                                                            |
|                                           | SAX Short axis                                                          | Resolution: 1.8 x 1.8 x 8<br>Matrix: 210 x 208 x 50<br>TE/TR = 1.1/32 ms, $\alpha = 10^\circ$ , R = 2                                                          |                                                                                                                                                                                                                                                                                                                                                                                                                                                                                                                                                                                |                                                                                                                                                                                                                                                                                   |                                                                                                                                                                                                                    |
|                                           | shMOLLI                                                                 | Resolution: 0.9375 x 0.9375 x 8<br>Matrix: variable x 384 x 7<br>TE/TR = 1.073/400 ms, $\alpha = 35^\circ$ , R = 2                                             |                                                                                                                                                                                                                                                                                                                                                                                                                                                                                                                                                                                |                                                                                                                                                                                                                                                                                   |                                                                                                                                                                                                                    |
|                                           | Aorta                                                                   | Resolution: 1.58 x 1.58 x 6<br>Matrix: 240 x 196 x 100<br>TE/TR = 1.17/28 ms, $\alpha = 66^\circ$ , R = 2                                                      |                                                                                                                                                                                                                                                                                                                                                                                                                                                                                                                                                                                |                                                                                                                                                                                                                                                                                   |                                                                                                                                                                                                                    |
| Brain MRI<br>Siemens 3.0T Skyra scanner   | T1 MPRAGE (magnetization-prepared rapid acquisition with gradient echo) | Resolution: 1.0 x 1.0 x 1.0<br>Matrix: 256 x 256 x 208<br>TI/TR = 880/2000 ms, R = 2                                                                           | Imaging-derived markers extracted via the FMRIB imaging processing pipeline <sup>25</sup> including:<br><ul style="list-style-type: none"> <li>• Grey and white tissue volumes estimated using a SIENAX-style analysis <sup>26</sup></li> <li>• FSL FAST grey matter segmentation <sup>27</sup></li> <li>• White matter hyperintensity volumes with BIANCA <sup>28</sup></li> <li>• Probabilistic tractography analysis with BEDPOSTx / PROBTRACKx <sup>29,30</sup></li> <li>• Diffusion IDP generation with diffusion tensor fitting (DTI) and NODDI <sup>31</sup></li> </ul> | Total brain volume<br>Grey matter volume<br>White matter volume<br>Volume of white matter hyperintensities<br><br>Fractional anisotropy (FA)<br>Mean diffusivity (MD)<br>Intracellular volume fraction (ICVF)<br>Isometric volume fraction (ISOVF)<br>Orientation dispersion (OD) | Smith, Alfaro-Almagro and Miller (2020) <sup>32</sup><br>Miller et al. (2016) <sup>33</sup><br>Alfaro-Almagro et al. (2018) <sup>25</sup><br>Smith et al. (2004) <sup>34</sup><br>Zhang et al (2012) <sup>31</sup> |
|                                           | T2 FLAIR {fluid-attenuated inversion recovery)                          | Resolution: 1.0 x 1.0 x 1.05<br>Matrix: 256 x 256 x 192<br>TI/TR = 1800/5000 ms, R = 2                                                                         |                                                                                                                                                                                                                                                                                                                                                                                                                                                                                                                                                                                |                                                                                                                                                                                                                                                                                   |                                                                                                                                                                                                                    |
|                                           | Diffusion MRI                                                           | Resolution: 2.0 x 2.0 x 2.0<br>Matrix: 104 x 104 x 72<br>TR = 3600 ms, 50 directions/shell, b = 0, 1000, 2000 s/mm <sup>2</sup> , $\alpha = 51^\circ$ , MB = 3 |                                                                                                                                                                                                                                                                                                                                                                                                                                                                                                                                                                                |                                                                                                                                                                                                                                                                                   |                                                                                                                                                                                                                    |

**Supplementary Table 8:** Acquisition parameters are reproduced from Littlejohns et al. (2020)[1]. T= Tesla, TR= repetition time, TE= echo time, LV = left ventricular, FMRIB = Functional Magnetic Resonance Imaging of the Brain. For additional information on algorithm acronyms please refer to the specified reference.

**Supplementary Table 9: White matter tracts included in average ISOVF and ICVF**

| <b>Group</b>                     | <b>Cluster</b>                | <b>White fibre tract</b>                                                                                                                             |
|----------------------------------|-------------------------------|------------------------------------------------------------------------------------------------------------------------------------------------------|
| <b>Inferior group</b>            | External capsule and uncinata | External capsule<br>Uncinate fasciculus                                                                                                              |
|                                  | Inferior pathways             | Inferior fronto occipital fasciculus<br>Inferior longitudinal fasciculus<br>Posterior thalamic radiation<br>Sagittal stratum                         |
| <b>Superior group</b>            | Medial / capsules             | Acoustic radiation<br>Posterior limb of internal capsule<br>Retrolenticular part of internal capsule                                                 |
|                                  | Superior pathways             | Posterior corona radiata<br>Superior corona radiata<br>Superior longitudinal fasciculus<br>Superior thalamic radiation                               |
| <b>Posterior corpus callosum</b> |                               | Forceps major<br>Splenium of corpus callosum<br>Tapetum                                                                                              |
| <b>Anterior pathways</b>         |                               | Anterior corona radiata<br>Anterior limb of internal capsule<br>Anterior thalamic radiation<br>Forceps minor<br>Superior fronto occipital fasciculus |
| <b>Corpus callosum</b>           |                               | Body of corpus callosum<br>Genu of corpus callosum                                                                                                   |
| <b>Cingulum gyrus</b>            |                               | Cingulate gyrus part of cingulum<br>Cingulum cingulate gyrus                                                                                         |
| <b>Fornix</b>                    |                               | Fornix<br>Fornix cres/stria terminalis                                                                                                               |
| <b>Cingulum parahippocampus</b>  |                               | Cingulum hippocampus<br>Parahippocampal part of cingulum                                                                                             |

*Supplementary Table 10: UK Biobank fields for disease classification*

| Source                  | Field ID and/or code (if applicable) | Description                                                                 |
|-------------------------|--------------------------------------|-----------------------------------------------------------------------------|
| <b>Diabetes</b>         |                                      |                                                                             |
| Diagnosed by doctor     | 2443                                 | Diabetes diagnosed by doctor                                                |
|                         | 2976                                 | Age diabetes diagnosed by doctor                                            |
| Self-report             | 20002                                | diabetes                                                                    |
|                         |                                      | type 1 diabetes                                                             |
|                         |                                      | type 2 diabetes                                                             |
| ICD10                   | E10                                  | Type 1 diabetes mellitus                                                    |
|                         | E11                                  | Type 2 diabetes mellitus                                                    |
|                         | E13                                  | Other specified diabetes mellitus                                           |
|                         | E14                                  | Unspecified diabetes mellitus                                               |
|                         | G590                                 | Diabetic mononeuropathy                                                     |
|                         | G632                                 | Diabetic polyneuropathy                                                     |
|                         | H280                                 | Diabetic cataract                                                           |
|                         | H360                                 | Diabetic retinopathy                                                        |
|                         | M142                                 | Diabetic arthropathy                                                        |
|                         | N083                                 | Glomerular disorders in diabetes mellitus                                   |
| ICD10                   | O240                                 | Diabetes mellitus in pregnancy: Pre-existing type 1 diabetes mellitus       |
|                         | O241                                 | Diabetes mellitus in pregnancy: Pre-existing type 2 diabetes mellitus       |
|                         | O243                                 | Diabetes mellitus in pregnancy: Pre-existing diabetes mellitus, unspecified |
|                         | O244                                 | Diabetes mellitus arising in pregnancy                                      |
|                         | O249                                 | Diabetes mellitus in pregnancy, unspecified                                 |
|                         | Y423                                 | Insulin and oral hypoglycaemic [antidiabetic] drugs                         |
| First occurrences       | 130706                               | Date E10 first reported (insulin-dependent diabetes mellitus)               |
|                         | 130708                               | Date E11 first reported (non-insulin-dependent diabetes mellitus)           |
|                         | 130712                               | Date E13 first reported (other specified diabetes mellitus)                 |
|                         | 130714                               | Date E14 first reported (unspecified diabetes mellitus)                     |
| Medications             | 3                                    | Insulin                                                                     |
| Biochemistry            | 30750                                | Glycated haemoglobin (HbA1c) >48                                            |
| ICD9                    | 250                                  | Diabetes mellitus                                                           |
| <b>High cholesterol</b> |                                      |                                                                             |
| Self-report             | 20002                                | high cholesterol                                                            |
| ICD10                   | E780                                 | Pure hypercholesterolaemia                                                  |
|                         | E782                                 | Mixed hyperlipidaemia                                                       |
|                         | E783                                 | Hyperchylomicronaemia                                                       |
|                         | E784                                 | Other hyperlipidaemia                                                       |
|                         | E785                                 | Hyperlipidaemia, unspecified                                                |

|                     |         |                                                                                     |
|---------------------|---------|-------------------------------------------------------------------------------------|
| First occurrences   | 130814  | Date E78 first reported (disorders of lipoprotein metabolism and other lipidaemias) |
| Medications         | 1       | Cholesterol lowering medication                                                     |
| Biochemistry        | 30690   | Total cholesterol > 7                                                               |
| <b>Hypertension</b> |         |                                                                                     |
| Self-report         | 20002   | essential hypertension                                                              |
|                     | 20002   | hypertension                                                                        |
| ICD10               | I10     | Essential (primary) hypertension                                                    |
| Medications         | 2       | Blood pressure medication                                                           |
| First occurrences   | 131286  | Date I10 first reported (essential (primary) hypertension)                          |
| Diagnosed by doctor | 6150: 4 | High blood pressure                                                                 |
|                     | 2966    | Age high blood pressure diagnosed                                                   |

**Supplementary Table 10:** Sources for ICD10 are Field IDs 41270, 41280, 41259 and 41234. Sources for ICD9 are Field IDs 41271, 41281, 41259 and 41234. Where a 3-digit ICD code is given, this includes all 4-digit subcodes (for example, E10 includes E100, E101 etc.)

**Supplementary Table 11: Summary of missing data handling in the main data set**  
(N= 30,444)

| Variable                 | Rows  | %    | Method                                                                    |
|--------------------------|-------|------|---------------------------------------------------------------------------|
| BMI                      | 804   | 2.6% | Forward projection from baseline [1]                                      |
| Height                   | 748   | 2.5% | Forward projection from baseline [1]                                      |
| Systolic blood pressure  | 2,723 | 8.9% | Forward projection from baseline [1]                                      |
| Total cholesterol        | 1,394 | 4.6% | MICE within biochemistry set [2]                                          |
| HbA1c                    | 1,575 | 5.2% | MICE within biochemistry set [2]                                          |
| Red blood cell count     | 836   | 2.7% | MICE within biochemistry set [2]                                          |
| Alcohol intake frequency | 230   | 0.8% | Forward projection from baseline, and remaining gaps filled with mean [3] |
| Physical activity        | 250   | 0.8% | Forward projection from baseline, and remaining gaps filled with mean [3] |
| Education                | 41    | 0.1% | Replaced with the mean [4]                                                |
| Cognitive function       | 629   | 2.1% | Replaced with the mean [4]                                                |

#### Method details

[1] Target variable was present at the baseline measurement but missing at time of imaging. In these cases, a linear model was constructed based on all data (the full 500,000 UKB set) relating, for example:

**Weight\_at\_imaging ~ Weight at baseline + age + sex + age x sex + days between baseline date and imaging date.**

Then the fitted linear estimate was used to impute the value where missing.

[2] MICE (multiple imputation by chained equations) was performed using the *mice* package in R, across the set of well-populated biochemistry fields, with the full set of UKB data, within a set of rows such that all variables were less than 6% missing, with the addition of age, sex, smoking, BMI, alcohol intake and Townsend deprivation score added to the multiple imputation equations. MICE was run with 7 iterations to produce a single data set.

[3] Same process as with method [1] but there were still a small number of residual missing values (missing at both baseline and imaging) which were replaced with the mean.

[4] A very small number of missing values were replaced with the mean.

**Supplementary Figure 1: Alternative forms considered for three-organ path analysis**

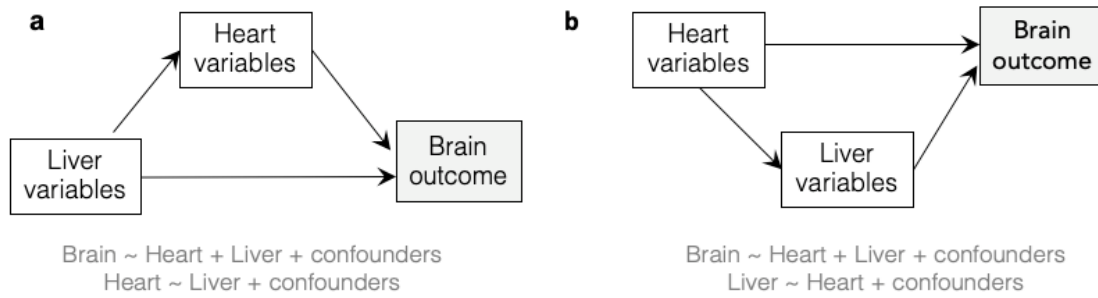

**Supplementary Figure 1:** Simultaneous heart-brain-liver relationships were investigated using three-organ path analysis in two alternative forms **a** and **b**. In both forms, heart variables are included together (reduced left ventricular stroke volume, reduced left ventricular global function index, increased mass-to-volume ratio and aortic stiffening) and liver variables are included together (liver fat and liver cT1) for a single brain outcome at a time. Brain outcomes studied were grey matter volume, white matter hyperintensities and free-water fraction.

**Supplementary Table 12: Component loadings**  
*show the correlation between the raw heart/liver features and their principal component counterparts.*

| Raw liver measures | Rotated components |                      |                 | N                 |        |
|--------------------|--------------------|----------------------|-----------------|-------------------|--------|
|                    | Liver fat          | Liver iron           | Liver cT1       |                   |        |
| Liver fat (PDFF)   | <b>0.933</b>       | 0.145                | 0.330           | 11,452            |        |
| Liver iron         | 0.117              | <b>0.991</b>         | -0.069          |                   |        |
| Liver cT1          | 0.320              | -0.083               | <b>0.944</b>    |                   |        |
| Raw heart measures | LVM/<br>LVEDV      | Aortic<br>stiffening | Reduced<br>LVSV | Reduced<br>LV GFI | N      |
| LVM/LVEDV          | <b>0.954</b>       | 0.101                | 0.154           | 0.235             | 22,798 |
| Aortic stiffening  | 0.090              | <b>0.993</b>         | 0.077           | 0.022             |        |
| Reduced LVSV       | 0.152              | 0.085                | <b>0.961</b>    | 0.216             |        |
| Reduced LV GFI     | 0.243              | 0.024                | 0.227           | <b>0.943</b>      |        |

**Supplementary Table 12:** Principal components analysis was performed for each organ, with the number of retained components equal to the number of input variables. Set sizes was determined by complete rows available for each organ. Varimax rotation was applied. For easier interpretability, three original heart variables were reversed so that all heart/liver variables would share the same directionality – these are: aortic stiffening = aortic distensibility \* -1, reduced LV stroke volume = LV stroke volume \* -1, and reduced LV GFI = LV GFI \* -1. LV= left ventricular, SV = stroke volume, GFI = global function index, PDFF= proton density fat fraction, LVM/LVEDV = left ventricular mass to volume ratio. Source data are provided as a Source Data file.

### *Supplementary References*

1. Wilman, H. R. *et al.* Characterisation of liver fat in the UK Biobank cohort. *PLoS ONE* **12**, e0172921 (2017).
2. McKay, A. *et al.* Measurement of liver iron by magnetic resonance imaging in the UK Biobank population. *PLOS ONE* **13**, e0209340 (2018).
3. Mojtahed, A. *et al.* Reference range of liver corrected T1 values in a population at low risk for fatty liver disease—a UK Biobank sub-study, with an appendix of interesting cases. *Abdom. Radiol.* **44**, 72–84 (2019).
4. Bachtiar, V. *et al.* Repeatability and reproducibility of multiparametric magnetic resonance imaging of the liver. *PloS One* **14**, e0214921 (2019).
5. Henninger, B. *et al.* Performance of different Dixon-based methods for MR liver iron assessment in comparison to a biopsy-validated R2\* relaxometry method. *Eur. Radiol.* **31**, 2252–2262 (2021).
6. Hutton, C., Gyngell, M. L., Milanesi, M., Bagur, A. & Brady, M. Validation of a standardized MRI method for liver fat and T2\* quantification. *PLOS ONE* **13**, e0204175 (2018).
7. McDonald, N. *et al.* Multiparametric magnetic resonance imaging for quantitation of liver disease: a two-centre cross-sectional observational study. *Sci. Rep.* **8**, 9189 (2018).
8. Harrison, S. A. *et al.* Prospective evaluation of the prevalence of non-alcoholic fatty liver disease and steatohepatitis in a large middle-aged US cohort. *J. Hepatol.* **75**, 284–291 (2021).
9. Bamberg, F. *et al.* Subclinical Disease Burden as Assessed by Whole-Body MRI in Subjects With Prediabetes, Subjects With Diabetes, and Normal Control Subjects From the General Population: The KORA-MRI Study. *Diabetes* **66**, 158–169 (2016).



10. Rehm, J. L. *et al.* Proton density fat-fraction is an accurate biomarker of hepatic steatosis in adolescent girls and young women. *Eur. Radiol.* **25**, 2921–2930 (2015).
11. Qi, Q. *et al.* Magnetic resonance imaging-derived proton density fat fraction (MRI-PDFF) is a viable alternative to liver biopsy for steatosis quantification in living liver donor transplantation. *Clin. Transplant.* **35**, e14339 (2021).
12. Garteiser, P. *et al.* Prospective comparison of transient elastography, MRI and serum scores for grading steatosis and detecting non-alcoholic steatohepatitis in bariatric surgery candidates. *JHEP Rep. Innov. Hepatol.* **3**, 100381 (2021).
13. Parisinos, C. A. *et al.* Genome-wide and Mendelian randomisation studies of liver MRI yield insights into the pathogenesis of steatohepatitis. *J. Hepatol.* **73**, 241–251 (2020).
14. Dennis, A. *et al.* Multiorgan impairment in low-risk individuals with post-COVID-19 syndrome: a prospective, community-based study. *BMJ Open* **11**, e048391 (2021).
15. Littlejohns, T. J. *et al.* The UK Biobank imaging enhancement of 100,000 participants: rationale, data collection, management and future directions. *Nature Communications* vol. 11 1–12 Preprint at <https://doi.org/10.1038/s41467-020-15948-9> (2020).
16. Perspectum. LiverMultiScan | Perspectum.  
<https://perspectum.com/products/livermultiscan> (2016).
17. Glover, G. H. Multipoint dixon technique for water and fat proton and susceptibility imaging. *J. Magn. Reson. Imaging* **1**, 521–530 (1991).
18. Irving, B. *et al.* Deep Quantitative Liver Segmentation and Vessel Exclusion to Assist in Liver Assessment. *Commun. Comput. Inf. Sci.* **723**, 663–673 (2017).
19. McKay, A. *et al.* Measurement of liver iron by magnetic resonance imaging in the UK Biobank population. *PLOS ONE* **13**, e0209340 (2018).

20. Mojtahed, A. *et al.* Reference range of liver corrected T1 values in a population at low risk for fatty liver disease—a UK Biobank sub-study, with an appendix of interesting cases. *Abdom. Radiol.* **44**, 72–84 (2019).
21. Wilman, H. R. *et al.* Characterisation of liver fat in the UK Biobank cohort. *PLoS ONE* **12**, 1–14 (2017).
22. Petersen, S. E. *et al.* Imaging in population science: Cardiovascular magnetic resonance in 100,000 participants of UK Biobank - Rationale, challenges and approaches. *J. Cardiovasc. Magn. Reson.* **15**, (2013).
23. Petersen, S. E. *et al.* UK Biobank’s cardiovascular magnetic resonance protocol. *J. Cardiovasc. Magn. Reson.* **18**, (2016).
24. Bai, W. *et al.* Automated cardiovascular magnetic resonance image analysis with fully convolutional networks 08 Information and Computing Sciences 0801 Artificial Intelligence and Image Processing. *J. Cardiovasc. Magn. Reson.* **20**, (2018).
25. Alfaro-Almagro, F. *et al.* Image processing and Quality Control for the first 10,000 brain imaging datasets from UK Biobank. *NeuroImage* **166**, 400–424 (2018).
26. Smith, S. M. Fast robust automated brain extraction. *Hum. Brain Mapp.* **17**, 143–155 (2002).
27. Zhang, Y., Brady, M. & Smith, S. Segmentation of brain MR images through a hidden Markov random field model and the expectation-maximization algorithm. *IEEE Trans. Med. Imaging* **20**, 45–57 (2001).
28. Griffanti, L. *et al.* BIANCA (Brain Intensity AbNormality Classification Algorithm): A new tool for automated segmentation of white matter hyperintensities. *NeuroImage* **141**, 191–205 (2016).

29. Behrens, T. E. J., Berg, H. J., Jbabdi, S., Rushworth, M. F. S. & Woolrich, M. W.  
Probabilistic diffusion tractography with multiple fibre orientations: What can we gain?  
*NeuroImage* **34**, 144–155 (2007).
30. De Groot, M. *et al.* Improving alignment in Tract-based spatial statistics: Evaluation and optimization of image registration. *NeuroImage* **76**, 400–411 (2013).
31. Zhang, H., Schneider, T., Wheeler-Kingshott, C. A. & Alexander, D. C. NODDI: Practical in vivo neurite orientation dispersion and density imaging of the human brain. *NeuroImage* **61**, 1000–1016 (2012).
32. Smith, S. M., Alfaro-Almagro, F. & Miller, K. L. UK Biobank - Brain Imaging Documentation. [biobank.ctsu.ox.ac.uk/crystal/docs/brain\\_mri.pdf](http://biobank.ctsu.ox.ac.uk/crystal/docs/brain_mri.pdf).
33. Miller, K. L. *et al.* Multimodal population brain imaging in the UK Biobank prospective epidemiological study. *Nat. Neurosci.* **19**, 1523–1536 (2016).
34. Smith, S. M. *et al.* Advances in functional and structural MR image analysis and implementation as FSL. *NeuroImage* **23**, S208–S219 (2004).
